# Supplementary material for: Expression of Vascular Endothelial Growth Factor and Interleukin-6 in bile duct healing with autologous parietal peritoneum: a non-inferiority experimental study in rabbits
Source: PeerJ. 2025 Jun 9;13:e19306. doi: 10.7717/peerj.19306 (PMC12161127; doi:10.7717/peerj.19306)
Supplement: Supplemental Information 1 — The expression of VEGF, IL-6, and fibroblast in different treatment groups. This data is useful for further statistical analysis. [file peerj-13-19306-s001.xlsx]

## Sheet: Sheet1
	No	Group	IL6 Tissue	VEGF Tissue	Fibroblas
	1	P1	76.93	7.69	15.33
	2	P1	160.33	6.32	21.33
	3	P1	177.55	22.49	26.33
	4	P2	436.87	21.09	10.67
	5	P2	136.91	12.47	12.33
	6	P2	160.33	5.58	3
	7	P3	95.72	6.78	17
	8	P3	122.94	10	30.33
	9	P3	353.27	10.88	23.67
	10	P4	160.33	5.4	24.33
	11	P4	122.5	8.16	24.67
	12	P4	50.61	7.72	37.33
	13	P5	155.7	9.17	11.67
	14	P5	160.33	6.81	24.67
	15	P5	173	9.7	28.33
	16	P6	160.33	6.04	20
	17	P6	647.48	6.64	32.67
	18	P6	22.7	8.98	21.67
	19	P7	72.09	11.43	17.67
	20	P7	160.33	6.5	25.67
	21	P7	18.53	5.31	23
	22	P8	49.16	6.91	18.67
	23	P8	306.87	7.34	28
	24	P8	44.96	5.5	23.33
	25	P9	160.33	7.13	23.33
	26	P9	31.29	5.21	23.33
	27	P9	111.52	5.58	33.33
